# Supplementary material for: Modification of amine-cured epoxy resins by boronic acids based on their reactivity with intrinsic diethanolamine units
Source: Royal Society of Chemistry journal article supplement (doi:10.1039/c8cc07412g), 2018-01-01
Supplement: c8cc07412g3.pdf [file c8cc07412g3.pdf]

## Video Abstract

Movie S1 shows the gelation of linear epoxy polymer (**EP**) by 4,4'-biphenyldiboronic acid (**diBA**).
